# Supplementary material for: Role of 5-thio-(2-nitrobenzoic acid)-capped gold nanoparticles in the sensing of chromium(vi): remover and sensor
Source: Royal Society of Chemistry journal article supplement (doi:10.1039/c1an15162b), 2011-01-01
Supplement: c1an15162b.pdf [file c1an15162b.pdf]

## Electronic supplementary information

Role of 5-thio-(2-nitrobenzoic acid)-capped gold nanoparticles in the sensing of chromium(VI): remover and sensor

Yi-Jhen Lai and Wei-Lung Tseng\*.

Department of Chemistry, National Sun Yat-sen University, Taiwan

**Correspondence:** Dr. Wei-Lung. Tseng, Department of Chemistry, National Sun Yat-sen University, 70, Lien-hai Road, Kaohsiung, Taiwan 804.

**E-mail:** tsengwl@mail.nsysu.edu.tw

**Fax:** 011-886-7-3684046.

### Experimental Section

**Synthesis of citrate-capped AuNPs.** Citrate-capped AuNPs were prepared by the chemical reduction of metal salt precursor (hydrogen tetrachloroaurate,  $\text{HAuCl}_4$ ) in a liquid phase. Briefly, we rapidly added trisodium citrate (20 mL, 38.8 mM) to a solution of  $\text{HAuCl}_4$  (200 mL, 1 mM) and heated the resulting solution under reflux for an additional 15 min. TEM images showed that the diameter of the AuNPs was  $13 \pm 1$  nm. The surface plasmon resonance (SPR) wavelength of citrate-capped AuNPs was 520 nm. Using Beer's law, the particle concentration of citrate-capped AuNP solution was determined to be 13 nM; the extinction coefficient of 13 nm AuNPs at 520 nm is  $2.7 \times 10^8 \text{ M}^{-1} \text{ cm}^{-1}$ .

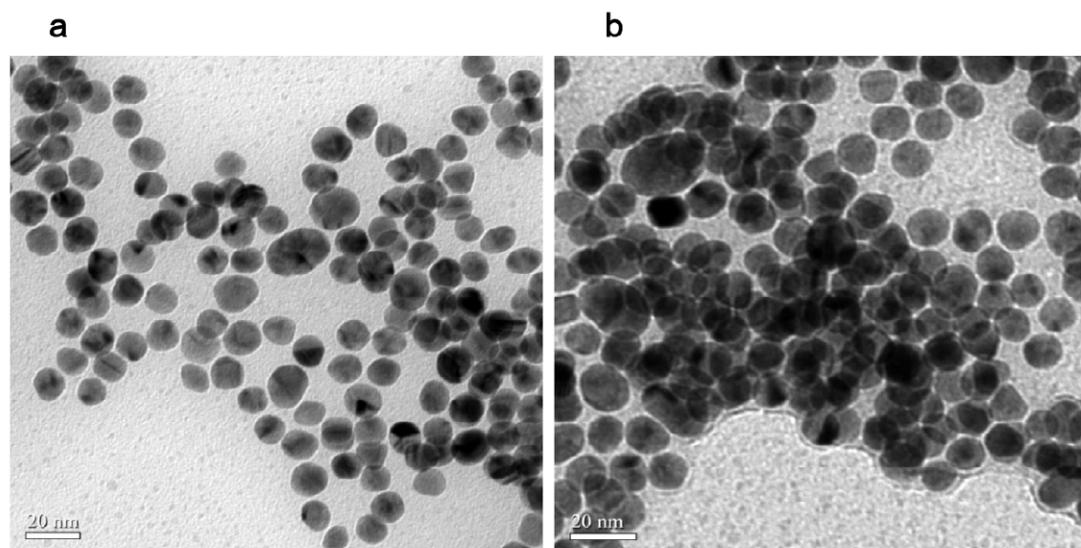

**Figure S1.** TEM images of solutions of 130 pM TNBA-AuNPs after the addition of (a) 10  $\mu$ M Cr(VI) and (b) 10  $\mu$ M Cr(VI) and 5 mM AA. The incubation time between Cr(VI) and AA was 10 min. TNBA-AuNPs were prepared in 90 mM HEPES at pH 7.5. TNBA-AuNPs are incubated with Cr(VI) and AA-treated Cr(VI) for 10 min, respectively.

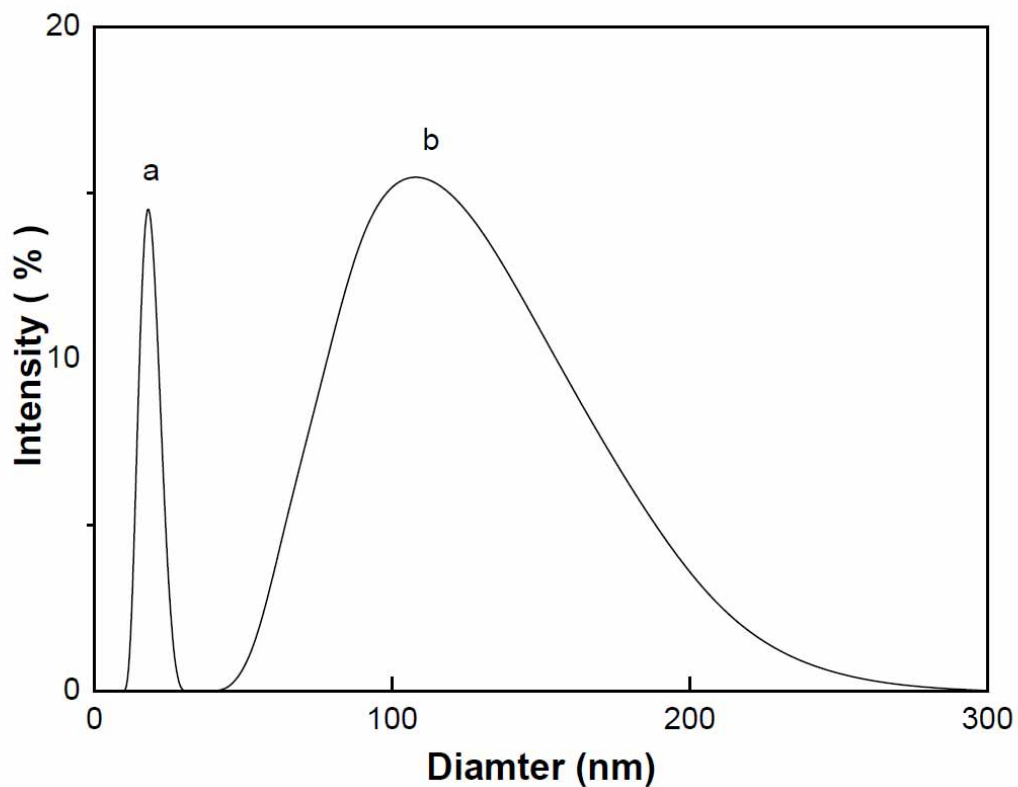

**Figure S2.** DLS spectra of solutions of 130 pM TNBA-AuNPs after the addition of (a) 10  $\mu$ M Cr(VI) and (b) 10  $\mu$ M Cr(VI) and 5 mM AA. The incubation time between Cr(VI) and AA was 10 min. TNBA-AuNPs are prepared in 90 mM HEPES at pH 7.5. TNBA-AuNPs were incubated with Cr(VI) and AA-treated Cr(VI) for 10 min, respectively.

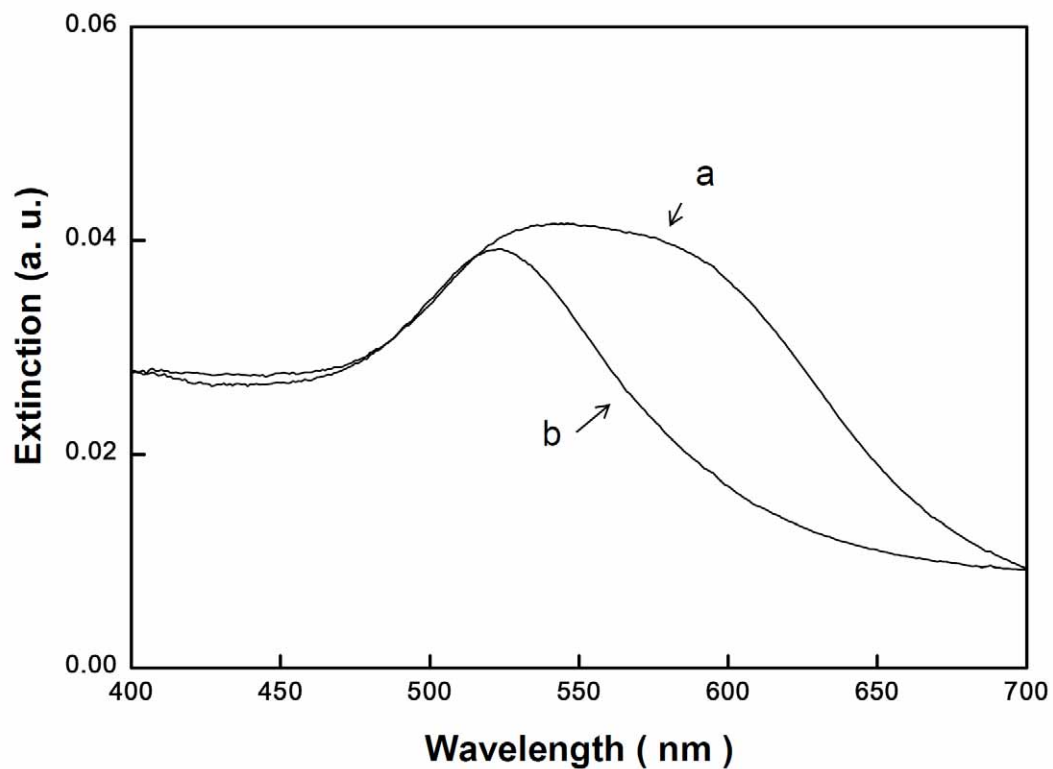

**Figure S3.** Extinction spectra of solutions of the TNBA-AuNPs after incubating 130 pM TNBA-AuNPs with (a) 10  $\mu$ M Cr(III) and (b) supernatant for 10 min. The supernatant was obtained by centrifuging a solution of 10  $\mu$ M Cr(III) and 2 nM TNBA-AuNPs. TNBA-AuNPs were prepared in 90 mM HEPES at pH 7.5.

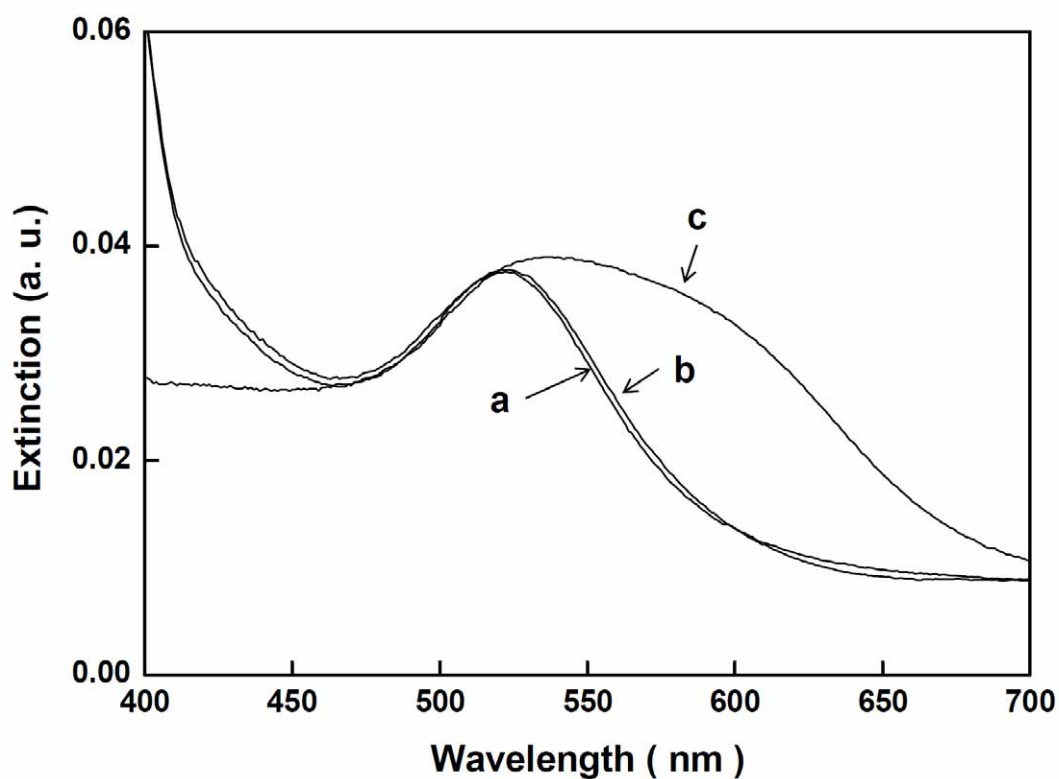

**Figure S4.** Extinction spectra of solutions of the AuNPs after incubating 130 pM TNBA-AuNPs with (a) 10  $\mu$ M Cr(VI), (b) supernatant, and (c) AA-treated supernatant for 10 min. (b, c) The supernatant was obtained by centrifuging a solution of 10  $\mu$ M Cr(VI) and 2 nM TNBA-AuNPs. (c) The obtained supernatant was treated with 5 mM AA for 10 min. TNBA-AuNPs were prepared in 90 mM HEPES at pH 7.5.

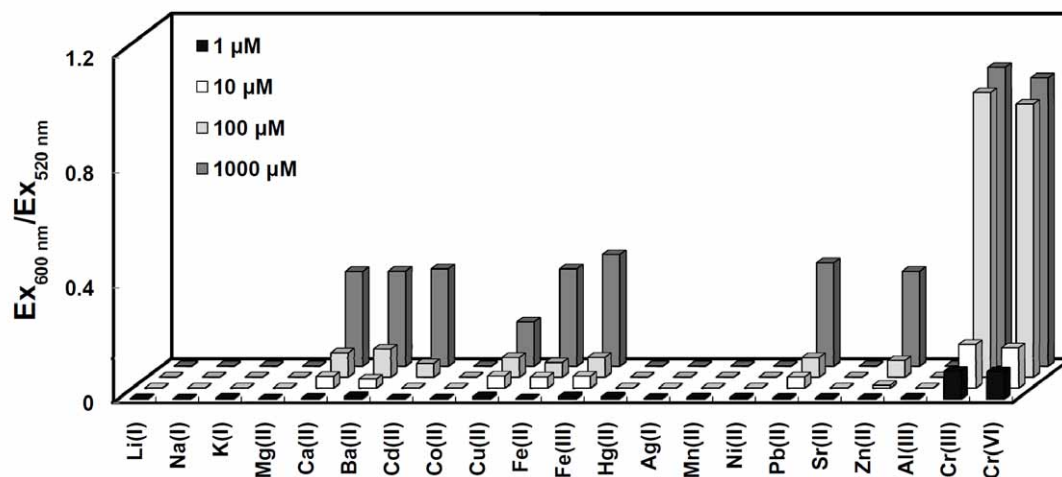

**Figure S5.** The value of  $Ex_{600\text{ nm}}/Ex_{520\text{ nm}}$  of 130 pM TNBA-AuNPs after the addition of a solution containing 1–1000  $\mu\text{M}$  metal ion and 5 mM AA. The metal ions were incubated with 5 mM AA for 10 min. TNBA-AuNPs were prepared in 90 mM HEPES at pH 7.5.

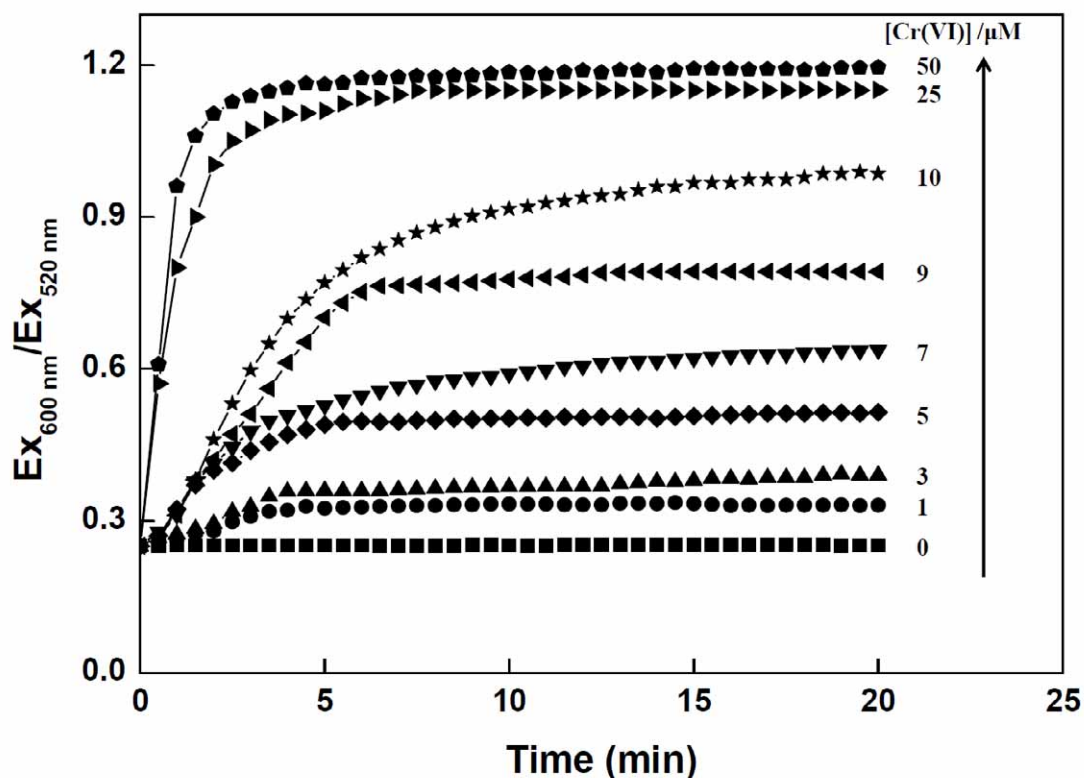

**Figure S6.** Time course measurement of the value of  $Ex_{600\text{ nm}}/Ex_{520\text{ nm}}$  of the AuNPs after incubating 130 pM TNBA-AuNPs with AA-treated supernatant for 0–20 min. The supernatant was obtained by centrifuging a solution of 0–50  $\mu\text{M}$  Cr(VI) and 2 nM TNBA-AuNPs. The supernatant was then treated with 5 mM AA for 10 min. TNBA-AuNPs were prepared in 90 mM HEPES at pH 7.5.

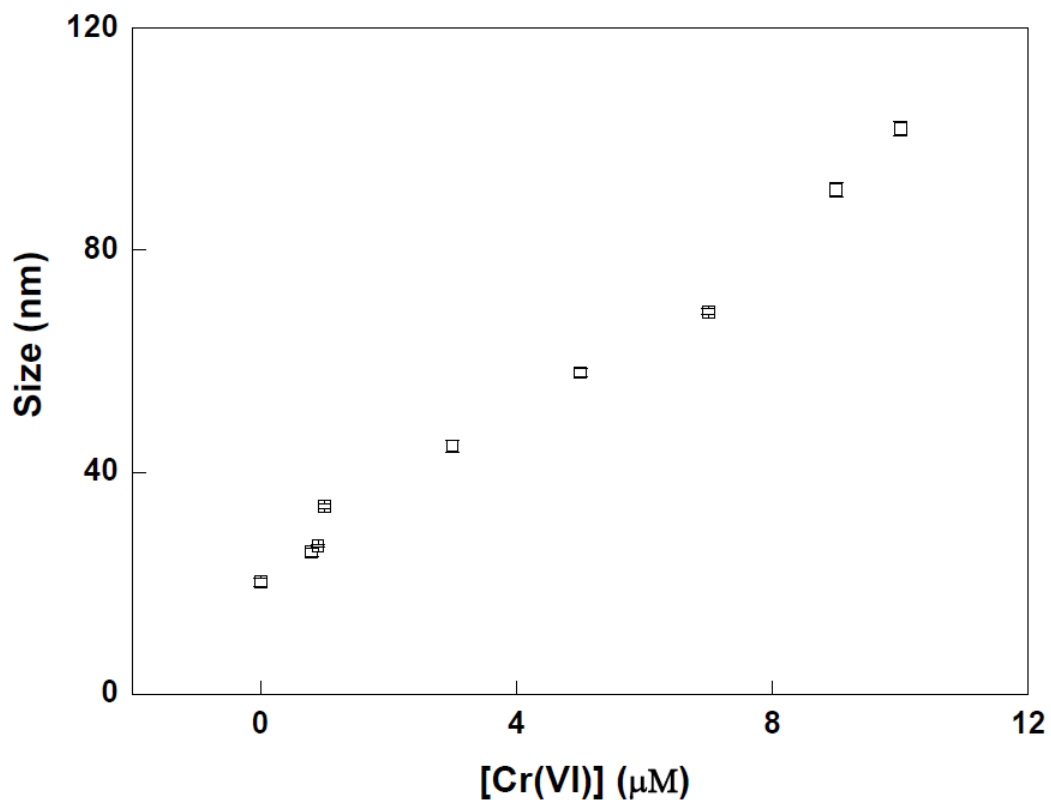

**Figure S7.** Hydrodynamic size of the AuNPs after incubating 130 pM TNBA-AuNPs with AA-treated supernatant for 10 min. The supernatant was obtained by centrifuging a solution of 0–10  $\mu\text{M}$  Cr(VI) and 2 nM TNBA-AuNPs. The supernatant was then treated with 5 mM AA for 10 min. TNBA-AuNPs were prepared in 90 mM HEPES at pH 7.5. The error bars represent standard deviations based on three independent measurements.



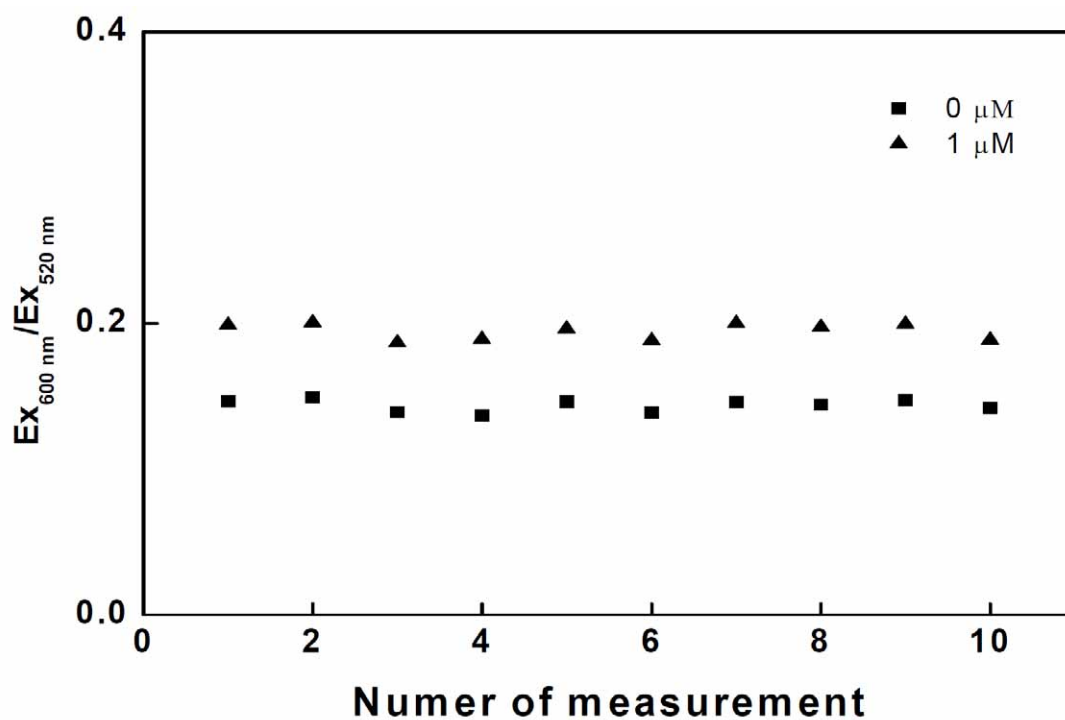

**Figure 8.** Ten replicate measurements of 0 and 1  $\mu\text{M}$  Cr(VI) using two-step process. The supernatant was obtained by centrifuging a solution of 1  $\mu\text{M}$  Cr(VI) and 2 nM TNBA-AuNPs. The supernatant was then treated with 5 mM AA for 10 min. The AA-treated supernatant was detected using 130 pM TNBA-AuNPs. TNBA-AuNPs were prepared in 90 mM HEPES at pH 7.5.

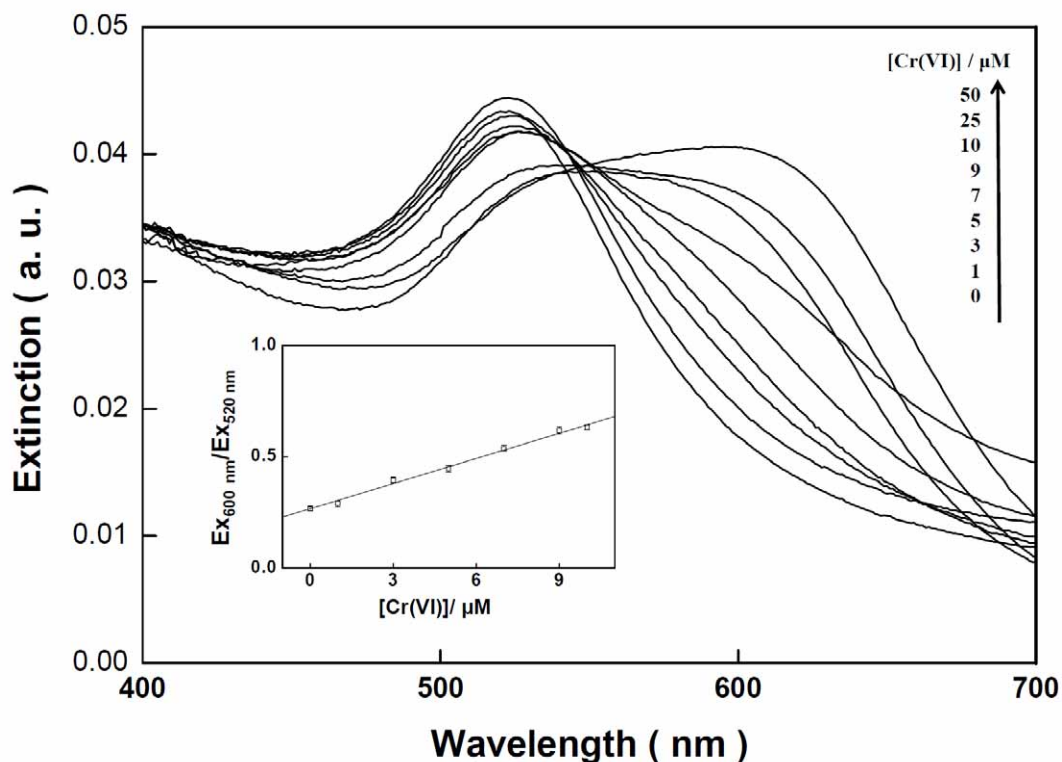

**Figure S9.** Colorimetric detection of Cr(VI) in drinking water. Drinking water samples were spiked by standard solutions containing 0–50  $\mu\text{M}$  Cr(VI). The supernatant was obtained by centrifugation of a solution containing the spiked drinking water and 2 nM TNBA-AuNPs. The supernatant was then treated with 5 mM AA for 10 min. The AA-treated supernatant was detected using 130 pM TNBA-AuNPs. The incubation time between AA-treated supernatant and TNBA-AuNPs was 10 min. TNBA-AuNPs were prepared in 90 mM HEPES at pH 7.5. Inset: a plot of the value of  $Ex_{600 \text{ nm}}/Ex_{520 \text{ nm}}$  versus the concentration of Cr(VI). The error bars represent standard deviations based on three independent measurements.

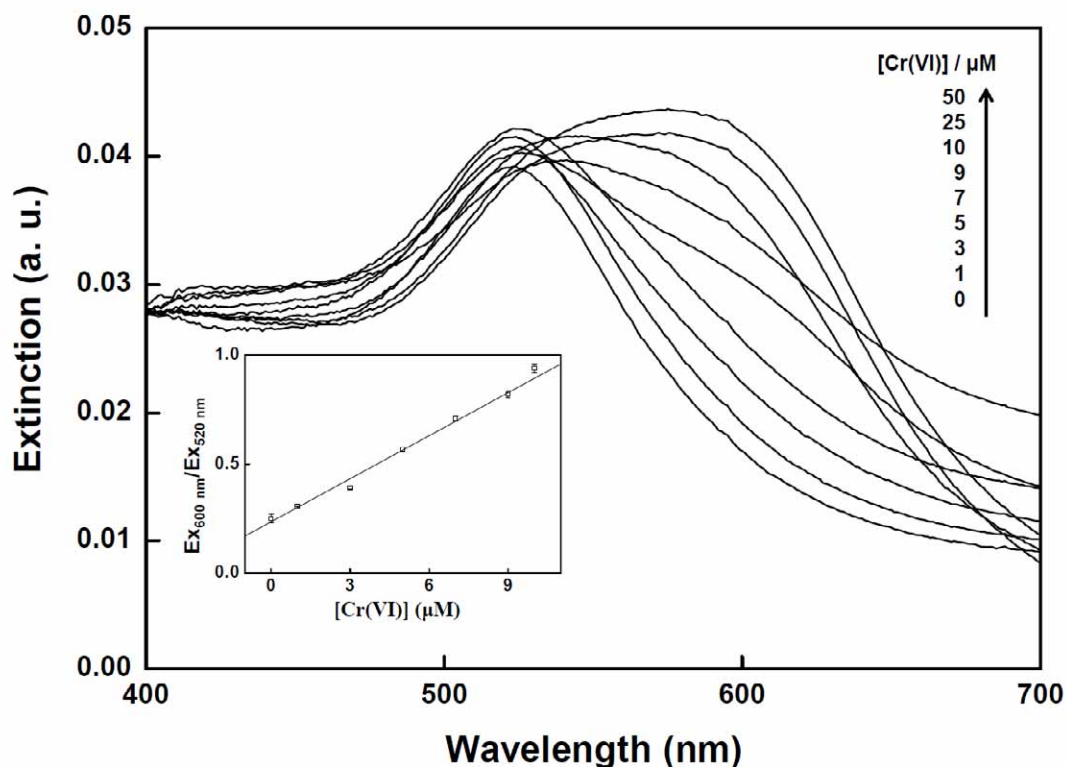

**Figure S10.** Colorimetric detection of Cr(VI) in tap water. Tap water samples were spiked by standard solutions containing 0–25  $\mu\text{M}$  Cr(VI). The supernatant was isolated by centrifugation of a solution containing the spiked tap water and 2 nM TNBA-AuNPs. The supernatant was then treated with 5 mM AA for 10 min. The AA-treated supernatant was detected using 130 pM TNBA-AuNPs. The incubation time between AA-treated supernatant and TNBA-AuNPs was 10 min. TNBA-AuNPs were prepared in 90 mM HEPES at pH 7.5. Inset: a plot of the value of  $Ex_{600 \text{ nm}}/Ex_{520 \text{ nm}}$  versus the concentration of Cr(VI). The error bars represent standard deviations based on three independent measurements.

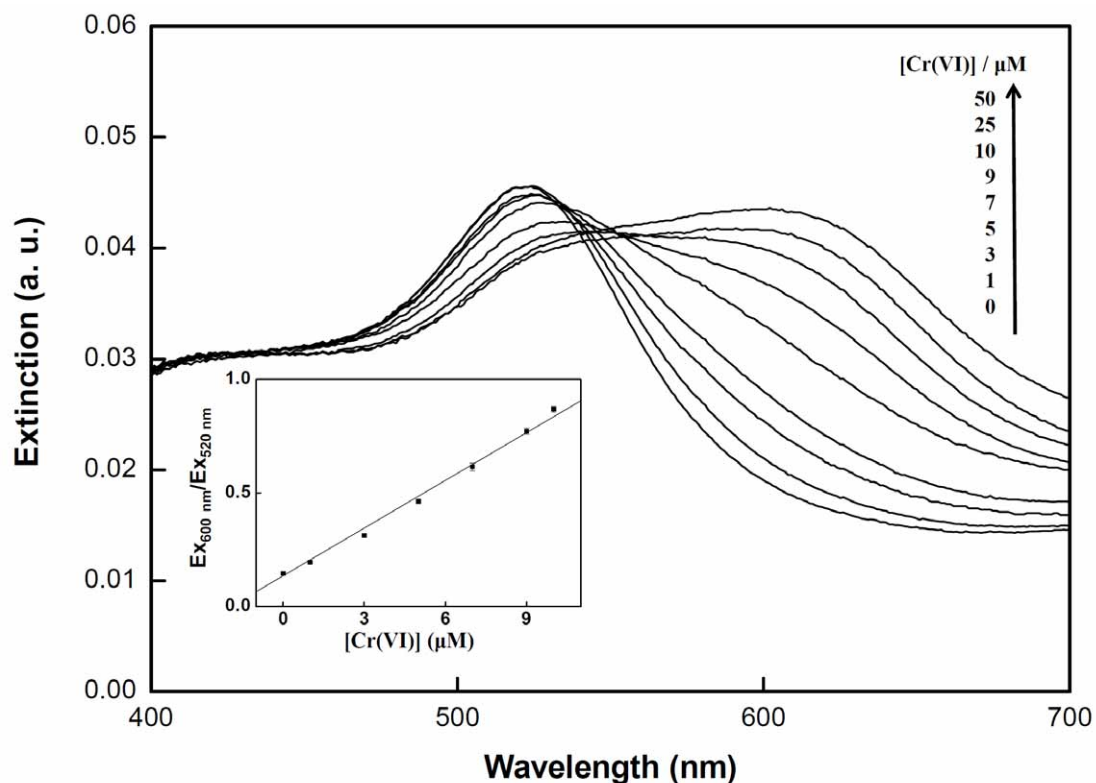

**Figure S11.** Colorimetric detection of Cr(VI) in lake water. Lake water samples were spiked by standard solutions containing 0–25  $\mu\text{M}$  Cr(VI). The supernatant was isolated by centrifugation of a solution containing the spiked tap water and 2 nM TNBA-AuNPs. The supernatant was then treated with 5 mM AA for 10 min. The AA-treated supernatant was detected using 130 pM TNBA-AuNPs. The incubation time between AA-treated supernatant and TNBA-AuNPs was 10 min. TNBA-AuNPs were prepared in 90 mM HEPES at pH 7.5. Inset: a plot of the value of  $Ex_{600 \text{ nm}}/Ex_{520 \text{ nm}}$  versus the concentration of Cr(VI). The error bars represent standard deviations based on three independent measurements.

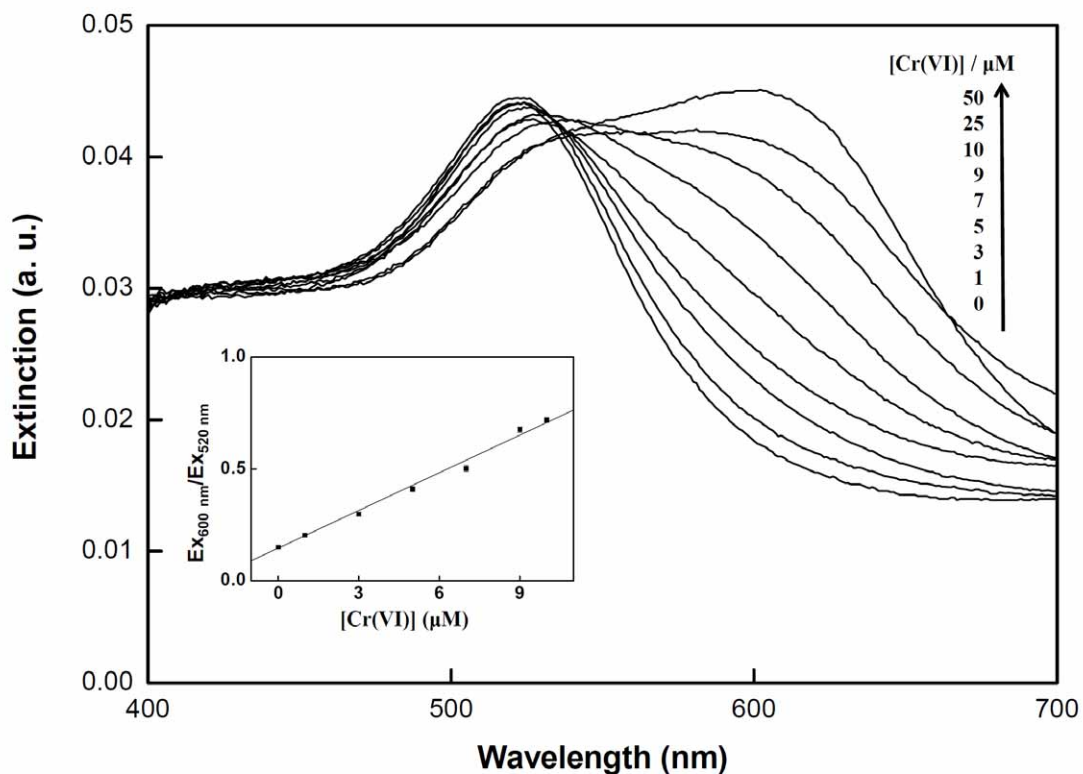

**Figure S12.** Colorimetric detection of Cr(VI) in river water. River water samples were spiked by standard solutions containing 0–25  $\mu\text{M}$  Cr(VI). The supernatant was isolated by centrifugation of a solution containing the spiked tap water and 2 nM TNBA-AuNPs. The supernatant was then treated with 5 mM AA for 10 min. The AA-treated supernatant was detected using 130 pM TNBA-AuNPs. The incubation time between AA-treated supernatant and TNBA-AuNPs was 10 min. TNBA-AuNPs were prepared in 90 mM HEPES at pH 7.5. Inset: a plot of the value of  $Ex_{600 \text{ nm}}/Ex_{520 \text{ nm}}$  versus the concentration of Cr(VI). The error bars represent standard deviations based on three independent measurements.
